# Supplementary material
Source: publisher figshare collection journal article supplement (https://frontiersin.figshare.com/ndownloader/files/24577190)
Supplement: Supplementary file 1 [file 24577190]

## Sheet: S isotopes
Table S7 Sulfur isotope data of porewater sulfide
Site ID	Depth in mat (cm)	d34S (VCDT)	Description
CC2A	2.5	-22.9241	Polygon center
CC2A	3.5	-23.9828	Polygon center
CC2A	4.5	-24.5572	Polygon center
CC2A	5.5	-24.896	Polygon center
CC2A	6.5	-25.6431	Polygon center
CC2A	7.5	-25.738	Polygon center
CC2A	8.5	-26.2623	Polygon center
CC2A	9.5	-26.7702	Polygon center
CC2A	10.5	-26.8788	Polygon center
CC2A	11.5	-27.3056	Polygon center
CC2A	12.5	-27.9824	Polygon center
CC2A	13.5	-27.5908	Polygon center
CC2B	2.5	-23.6548	Intersection between polygons
CC2B	3.5	-24.7923	Intersection between polygons
CC2B	4.5	-24.7638	Intersection between polygons
CC2B	5.5	-26.2634	Intersection between polygons
CC2B	6.5	-27.073	Intersection between polygons
CC2B	7.5	-28.0307	Intersection between polygons
CC2B	8.5	-28.2018	Intersection between polygons
CC2B	9.5	-27.966	Intersection between polygons
CC2B	10.5	-28.2028	Intersection between polygons
CC2B	11.5	-27.7641	Intersection between polygons
CC2B	12.5	-28.0899	Intersection between polygons
CC2B	13.5	-28.0011	Intersection between polygons
CC2C	4.5	-24.743	Polygon center
CC2C	5.5	-25.1511	Polygon center
CC2C	6.5	-25.5602	Polygon center
CC2C	7.5	-26.5322	Polygon center
CC2C	9	-26.8843	Polygon center
CC2C	10.5	-26.8613	Polygon center
CC2C	11.5	-28.5693	Polygon center
CC2C	12.5	-28.2622	Polygon center
CC2C	13.5	-27.462	Polygon center
CC1A	2	-19.573
CC1B	2.5	-27.3858
CC1A	3	-26.498
CC1B	3.5	-26.6745
CC1A	15	-25.6358
CC1A	17	-23.8431
CC7A	2	-24.6006
CC7A	5	-24.3319
FM3A	1	-23.5076
FM3A	3	-24.2783
FM3A	7	-25.1955
FM3A	8.5	-25.0835
FM4A	1.5	-25.7386
FM4A	2.5	-26.9942
FM4D	2.5	-24.9837
FM4C	3	-25.304
FM4B	3.5	-25.7658
FM4A	4.5	-26.2909
FM4A	6.5	-25.3617
